# Supplementary material
Source: publisher figshare collection journal article supplement (https://sage.figshare.com/ndownloader/files/18169292)
Supplement: Supplementary file 1 [file 18169292]

**Search terms used in citation databases**

#1 reflexology

#2 foot massag*

#3 feet massag*

#4 zone therap*

#5 reflex therap*

#6 relaxation technique

#7 Massag*

#8 aromatherapy

#9 compl?mentary therap*

#10 Bodywork

#11 Craniosacral

#12 Rolfing

#13 Shiatsu

#14 Healing touch

#15 Soft tissue mobilisation

#16 Soft tissue manipulation

#17 Massotherapy

#18 Foot reflex

#19 Aroma

#20 Acupressure

#21 Alternative medicine

#22 Alternative therap*

#23 Essential oil

#24 Plant oil

#25 Essence oil

#26 Swedish massage (?)

AND

#1 PALLIATIVE CARE

#2 Exp TERMINAL-CARE

#3 TERMINALLY-ILL

#4 HOSPICES

#5 RESPITE-CARE

#6 palliat*

#7 terminal* NEAR/6 care*

#8 terminal* NEAR/6 caring

#9 terminal* NEAR/6 ill*

#10 hospice*

#11 Endstage

#12 End of life

#13 Care of dying

#14 ((advanced or late or last or end or final) (stage or phase))

#15 Metastasi*ed

#16 Metastatic

#17 Advance* disease

#18 Incurable illness

#19 Incurable disease

#20 Progressive

#21 life limiting disease/illness

Medical subject terms were applied per database as appropriate.
